# Supplementary material for: Rapid Colonoscopy Preparation Using Bolus Lukewarm Saline Combined with Sequential Posture Changes: A Randomized Controlled Trial
Source: PubMed Central journal article supplement — Dig Dis Sci. 2013 Mar 2;58(8):2156–66. doi: 10.1007/s10620-013-2598-9 (PMC3731514; doi:10.1007/s10620-013-2598-9), 2013-03-02
Supplement: 10620_2013_2598_MOESM1_ESM.pdf [file 10620_2013_2598_MOESM1_ESM.pdf]

| Follow Steps 1 to 8 and keep repeating these steps until you have clear bowel movement. |                                                                                                                                                                                                          |                                                                                                                                                                                                                                                                                                |                           |                                                                                                                                                                                                                                                                                                 |                                                                   |  |
|-----------------------------------------------------------------------------------------|----------------------------------------------------------------------------------------------------------------------------------------------------------------------------------------------------------|------------------------------------------------------------------------------------------------------------------------------------------------------------------------------------------------------------------------------------------------------------------------------------------------|---------------------------|-------------------------------------------------------------------------------------------------------------------------------------------------------------------------------------------------------------------------------------------------------------------------------------------------|-------------------------------------------------------------------|--|
| Step 1                                                                                  | Drink 1-2 glasses, 8 Oz (240ml) each, of the prepared solution. Drink continuously rather than sipping.                                                                                                  |                                                                                                                                                                                                                                                                                                |                           |                                                                                                                                                                                                                                                                                                 |                                                                   |  |
| Step 2<br>Upward<br>Stretch                                                             | Get Ready                                                                                                                                                                                                | Inhale                                                                                                                                                                                                                                                                                         |                           | Exhale                                                                                                                                                                                                                                                                                          | Repeat                                                            |  |
|                                                                                         | 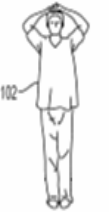 <p><b>Hands:</b> Interlace fingers, hands on head, palm facing up<br/><b>Feet:</b> Feet together,<br/>stand erect.</p> |  <p><b>Hands:</b> Stretch upwards.<br/><b>Feet:</b> Stand on toes stretch up.</p>                                                                                                                             |                           |  <p>Return to ready position</p>                                                                                                                                                                              | The Upward Stretch ten times                                      |  |
|                                                                                         |  <p><b>Hands:</b> Interlace fingers, stretch arms upwards, Palms facing up.<br/><b>Feet:</b> 1-2 feet apart</p>         |  <p><b>Hands:</b> Bend both arms to right.<br/><b>Feet:</b> 1-2 feet apart</p>                                                                                                                                | Return to ready position  |  <p><b>Hands:</b> Bend both arms to left.<br/><b>Feet:</b> 1-2 feet apart</p>                                                                                                                                 | The Side Stretch five times on right and five times on left.      |  |
| Step 4                                                                                  | Drink 1-2 glasses, 8 Oz (240ml) each, of the prepared solution. Drink continuously rather than sipping.                                                                                                  |                                                                                                                                                                                                                                                                                                |                           |                                                                                                                                                                                                                                                                                                 |                                                                   |  |
|                                                                                         |  <p><b>Hands:</b> Stretch arms, palm facing downwards.<br/><b>Feet:</b> : 1-2 feet apart</p>                           |  <p><b>Hands:</b> Left hand on right shoulder and right hand on small of back, palm facing out.<br/>Rotate your upper body towards the right. Try to see your left heel.<br/><b>Feet:</b> 1-2 feet apart</p> | Return to ready position  |  <p><b>Hands:</b> Right hand on left shoulder and left hand on small of back, Palm facing out.<br/>Rotate your upper body towards the left. Try to see your right heel.<br/><b>Feet:</b> 1-2 feet apart.</p> | The Twist Stretch five times on right and five times on left.     |  |
|                                                                                         |  <p><b>Hands:</b> Lie down on stomach, raise your body.<br/><b>Feet:</b> 1-2 feet apart</p>                           |  <p><b>Hands:</b> Twist towards the right turning your head to the right until you see the heels.<br/><b>Feet:</b> 1-2 feet apart</p>                                                                       | Return to ready position  |  <p><b>Hands:</b> Twist towards the left turning your head to the left until you see the heels.<br/><b>Feet:</b> 1-2 feet apart</p>                                                                         | The Push up Stretch five times on right and five times on left.   |  |
| Step 7                                                                                  | Drink 1-2 glasses, 8 Oz (240ml) each, of the prepared solution. Drink continuously rather than sipping.                                                                                                  |                                                                                                                                                                                                                                                                                                |                           |                                                                                                                                                                                                                                                                                                 |                                                                   |  |
|                                                                                         |  <p><b>Feet:</b> Squat on 1 foot apart.<br/><b>Hands:</b> Palm on knees</p>                                           |  <p><b>Feet:</b> Touch right knee to left toe<br/><b>Hands:</b> Palm on knees</p>                                                                                                                           | Return to ready position. |  <p><b>Feet:</b> Touch left knee to right toe<br/><b>Hands:</b> Palm on knees</p>                                                                                                                           | The Squatting Stretch five times on right and five times on left. |  |

At any point if you have an urge to defecate, go to the toilet but do not strain

**Supplement 1. Shudh™ Colon Cleanse Instructions**
